# Supplementary material for: Prevalence of Human Papilloma Virus Infection in Bladder Cancer: A Systematic Review
Source: MDPI journal article supplement (doi:10.3390/diagnostics12071759), 2022-07-20
Supplement: s1 [file s1]

**Table S1a: Characteristics of the included studies ordered by study design: a) case-control;**

| First author           | Year | Title                                                                                                                                                                           | Type of study      | Multicentre / Single Centre | Country/ies | Study period |
|------------------------|------|---------------------------------------------------------------------------------------------------------------------------------------------------------------------------------|--------------------|-----------------------------|-------------|--------------|
| Abdollahzadeh P, et al | 2017 | Association Between Human Papillomavirus and Transitional Cell Carcinoma of the Bladder                                                                                         | Case/control study | Single                      | Iran        | 2008-2011    |
| Badawi H, et al        | 2008 | Role of human papillomavirus types 16, 18, and 52 in recurrent cystitis and urinary bladder cancer among Egyptian patients                                                      | Case/control study | Single                      | Egypt       | 2001-2006    |
| Barghi MR, et al       | 2005 | Correlation between human papillomavirus infection and bladder transitional cell carcinoma                                                                                      | Case/control study | Single                      | Iran        | 199-2002     |
| Gould VE, et al        | 2010 | Human papillomavirus and p16 expression in inverted papillomas of the urinary bladder                                                                                           | Case/control study | Single                      | USA         | -            |
| Kim SH, et al          | 2014 | Detection of human papillomavirus infection and p16 immunohistochemistry expression in bladder cancer with squamous differentiation                                             | Case/control study | Single                      | Korea       | 2001-2011    |
| Mete UK, et al         | 2018 | Human Papillomavirus in Urothelial Carcinoma of Bladder: An Indian study                                                                                                        | Case/control study | Single                      | India       | -            |
| Sarier M, et al        | 2019 | Is There any Association between Urothelial Carcinoma of the Bladder and Human Papillomavirus? A Case-Control Study                                                             | Case/control study | Single                      | Turkey      | Jan-Dec 2018 |
| Shaker OG, et al       | 2013 | Is there a correlation between HPV and urinary bladder carcinoma?                                                                                                               | Case/control study | Single                      | Egypt       | -            |
| Shigehara K, et al     | 2011 | Etiologic role of human papillomavirus infection in bladder carcinoma                                                                                                           | Case/control study | Single                      | Japan       | 1997-2009    |
| Steinestel J, et al    | 2013 | Overexpression of p16INK4a in Urothelial Carcinoma In Situ Is a Marker for MAPK-Mediated Epithelial-Mesenchymal Transition but Is Not Related to Human Papillomavirus Infection | Case/control study | Single                      | Germany     | 2001-2011    |
| Tekin MI, et al        | 1999 | Human papillomavirus associated with bladder carcinoma? Analysis by polymerase chain reaction                                                                                   | Case/control study | Single                      | Turkey      | -            |

**Table S1b: Characteristics of the included studies ordered by study design: b) cross-sectional design.**

| First author                | Year | Title                                                                                                                                                                      | Type of study                     | Multicentre / Single Centre | Country/ies                     | Study period |
|-----------------------------|------|----------------------------------------------------------------------------------------------------------------------------------------------------------------------------|-----------------------------------|-----------------------------|---------------------------------|--------------|
| Aggarwal S, et al           | 2009 | Koilocytosis: correlations with high-risk HPV and its comparison on tissue sections and cytology, urothelial carcinoma                                                     | Retrospective observational study | Single                      | India                           | -            |
| Alexander RE, et al         | 2012 | p16 expression is not associated with human papillomavirus in urinary bladder squamous cell carcinoma                                                                      | Retrospective observational study | Single                      | USA                             | 1992-2011    |
| Alexander RE, et al         | 2013 | Human papillomavirus is not an etiologic agent of urothelial inverted papillomas                                                                                           | Retrospective observational study | Multi                       | USA<br>Spain<br>Italy<br>France | 1985-2005    |
| Alexander RE, et al         | 2014 | The expression patterns of p53 and p16 and an analysis of a possible role of HPV in primary adenocarcinoma of the urinary bladder                                          | Retrospective observational study | Multi                       | USA<br>Spain<br>Italy<br>France | -            |
| Ben Selma W, et al          | 2010 | Investigation of human papillomavirus in bladder cancer in a series of Tunisian patients                                                                                   | Observational study               | Single                      | Tunisia                         | 2003-2004    |
| Berrada N, et al            | 2013 | Human papillomavirus detection in Moroccan patients with bladder cancer                                                                                                    | Prospective study                 | Single                      | Morocco                         | -            |
| Chan KW, et al              | 1997 | Prevalence of six types of human papillomavirus in inverted papilloma and papillary transitional cell carcinoma of the bladder: an evaluation by polymerase chain reaction | Retrospective observational study | Single                      | China                           | 1987-1994    |
| Chapman-Fredricks JR, et al | 2013 | High-risk human papillomavirus DNA detected in primary squamous cell carcinoma of urinary bladder                                                                          | Retrospective observational study | Single                      | USA                             | -            |
| Collins K, et al            | 2020 | Prevalence of high-risk human papillomavirus in primary squamous cell carcinoma of urinary bladder                                                                         | Retrospective observational study | Single                      | Texas                           | 2009-2019    |

|                       |      |                                                                                                                                         |                                   |        |              |           |
|-----------------------|------|-----------------------------------------------------------------------------------------------------------------------------------------|-----------------------------------|--------|--------------|-----------|
| Cooper K, et al       | 1997 | Human papillomavirus and schistosomiasis associated bladder cancer                                                                      | Retrospective observational study | Single | South Africa | -         |
| De Gaetani C, et al   | 1999 | Detection of human papillomavirus DNA in urinary bladder carcinoma by in situ hybridisation                                             | Retrospective observational study | Single | Italy        | 1995-1997 |
| Fioriti D, et al      | 2003 | Urothelial bladder carcinoma and viral infections: different association with human polyomaviruses and papillomaviruses                 | Comparative study                 | Single | Italy        | -         |
| Gazzaniga P, et al    | 1998 | Prevalence of papillomavirus, Epstein-Barr virus, cytomegalovirus, and herpes simplex virus type 2 in urinary bladder cancer            | Retrospective observational study | Single | Italy        | -         |
| Golovina DA, et al    | 2016 | Loss of Cell Differentiation in HPV-Associated Bladder Cancer                                                                           | Retrospective observational study | Single | Russia       | -         |
| Gopalkrishna V, et al | 1995 | Detection of human papillomavirus DNA sequences in cancer of the urinary bladder by in situ hybridisation and polymerase chain reaction | Retrospective observational study | Single | India        | -         |
| Javanmard B, et al    | 2019 | Human Papilloma Virus DNA in Tumor Tissue and Urine in Different Stage of Bladder Cancer                                                | Retrospective observational study | Single | Iran         | 2014-2016 |
| Kamel D, et al        | 1995 | Human papillomavirus DNA and abnormal p53 expression in carcinoma of the urinary bladder                                                | Retrospective observational study | Single | Finland      | 1987-1992 |
| Kim KH, et al         | 1995 | Analysis of p53 tumor suppressor gene mutations and human papillomavirus infection in human bladder cancers                             | Retrospective observational study | Single | Korea        | -         |
| LaRue H, et al        | 1995 | Human papillomavirus in transitional cell carcinoma of the urinary bladder                                                              | Retrospective observational study | Single | Canada       | -         |
| Llewellyn MA, et al   | 2018 | Defining the frequency of human papillomavirus and polyomavirus infection in urothelial bladder tumours                                 | Retrospective observational study | Single | UK           | 2005-2011 |

|                        |       |                                                                                                                                                       |                                   |        |         |           |
|------------------------|-------|-------------------------------------------------------------------------------------------------------------------------------------------------------|-----------------------------------|--------|---------|-----------|
| Lopez-Beltran A, et al | 1996a | Human papillomavirus DNA as a factor determining the survival of bladder cancer patients                                                              | Retrospective observational study | Single | Spain   | -         |
| López-Beltrán A, et al | 1996b | Human papillomavirus infection and transitional cell carcinoma of the bladder: Immunohistochemistry and in situ hybridization                         | Observational study               | Single | Spain   | -         |
| Moghadam SO, et al     | 2020  | Association of human papilloma virus (HPV) infection with oncological outcomes in urothelial bladder cancer                                           | Prospective study                 | Single | Iran    | -         |
| Musangile FY, et al    | 2021  | Detection of HPV infection in urothelial carcinoma using RNAscope: Clinicopathological characterization                                               | Retrospective observational study | Single | Japan   | 2013-2019 |
| Pichler R, et al       | 2015  | Low prevalence of HPV detection and genotyping in non-muscle invasive bladder cancer using single-step PCR followed by reverse line blot              | Prospective study                 | Single | Austria | -         |
| Samarska IV, et al     | 2019  | Condyloma Acuminatum of Urinary Bladder: Relation to Squamous Cell Carcinoma                                                                          | Observational study               | Single | *       | -         |
| Schmid SC, et al       | 2015  | Human papilloma virus is not detectable in samples of urothelial bladder cancer in a central European population: a prospective translational study   | Prospective study                 | Single | Germany | -         |
| Shigehara K, et al     | 2013  | Etiological correlation of human papillomavirus infection in the development of female bladder tumor                                                  | Prospective study                 | Single | Japan   | 1996-2010 |
| Simoneau M, et al      | 1999  | Low frequency of human papillomavirus infection in initial papillary bladder tumors                                                                   | Retrospective observational study | Single | Canada  | 1990-1992 |
| Tenti P, et al         | 1996  | p53 overexpression and human papillomavirus infection in transitional cell carcinoma of the urinary bladder: correlation with histological parameters | Retrospective observational study | Single | Italy   | -         |

|                     |      |                                                                                                                                                       |                                   |        |             |           |
|---------------------|------|-------------------------------------------------------------------------------------------------------------------------------------------------------|-----------------------------------|--------|-------------|-----------|
| Westenend PJ, et al | 2001 | Human papillomaviruses 6/11, 16/18 and 31/33/51 are not associated with squamous cell carcinoma of the urinary bladder                                | Retrospective observational study | Single | Netherlands | -         |
| Yan Y, et al        | 2021 | Human Papillomavirus Prevalence and Integration Status in Tissue Samples of Bladder Cancer in the Chinese Population                                  | Retrospective observational study | Single | China       | 2015-2019 |
| Yavuzer D, et al    | 2011 | Role of human papillomavirus in the development of urothelial carcinoma                                                                               | Retrospective observational study | Single | Turkey      | -         |
| Youshya S, et al    | 2005 | Does human papillomavirus play a role in the development of bladder transitional cell carcinoma? A comparison of PCR and immunohistochemical analysis | Retrospective observational study | Single | England     | -         |

**Table S2. Demographics characteristics of studies enrolled.**

| First author                      | Sample size | Cases | Controls | Gender (by cases or total) |       | Gender (by controls) |       | Mean/median (SD/range) age by cases or total | Specimen type |      |
|-----------------------------------|-------------|-------|----------|----------------------------|-------|----------------------|-------|----------------------------------------------|---------------|------|
|                                   |             |       |          | Females                    | Males | Females              | Males |                                              | Fresh         | FFPE |
| <i>Abdollahzadeh P; 2017</i>      | 97          | 67    | 30       | 9                          | 58    | 13                   | 17    | -                                            | -             | 97   |
| <i>Aggarwal S; 2009</i>           | 33          | -     | -        | 7                          | 26    | -                    | -     | 56.5 (28-80)                                 | -             | 33   |
| <i>Alexander RE; 2012</i>         | 69          | -     | -        | 21                         | 48    | -                    | -     | 69.5 (37-101)                                | -             | 69   |
| <i>Alexander RE; 2013</i>         | 27          | -     | -        | 2                          | 23    | -                    | -     | 61 (32-78)                                   | -             | 27   |
| <i>Alexander RE; 2014</i>         | 36          | -     | -        | -                          | -     | -                    | -     | 61 (32-87)                                   | -             | 36   |
| <i>Badawi H; 2008</i>             | 80          | 60    | 20       | 13                         | 47    | -                    | -     | 49.37 (13.61/16-75)                          | 60            | -    |
| <i>Barghi MR; 2005</i>            | 79          | 59    | 20       | 9                          | 50    | 4                    | 16    | 67 (10.8)                                    | -             | 79   |
| <i>Ben Selma W; 2010</i>          | 125         | -     | -        | 16                         | 109   | -                    | -     | 70** (28-99)                                 | -             | 125  |
| <i>Berrada N; 2013</i>            | 48          | -     | -        | 38                         | 4     | -                    | -     | 65 (32-86)                                   | -             | 48   |
| <i>Chan KW; 1997</i>              | 30          | -     | -        | -                          | -     | -                    | -     | -                                            | -             | 34   |
| <i>Chapman-Fredricks JR; 2013</i> | 14          | -     | -        | 6                          | 8     | -                    | -     | -                                            | -             | 14   |
| <i>Collins K; 2020</i>            | 33          | -     | -        | 17                         | 16    | -                    | -     | 64 (59-91)                                   | -             | 33   |
| <i>Cooper K; 1997</i>             | 25          | -     | -        | 7                          | 18    | -                    | -     | 47** (29-72)                                 | -             | 25   |
| <i>De Gaetani C; 1999</i>         | 43          | -     | -        | 5                          | 38    | -                    | -     | 66.3 (19.8/36-85)                            | -             | -    |
| <i>Fioriti D; 2003</i>            | 52          | 32    | 20       | 4                          | 28    | 7                    | 13    | 64.6 (20-92)                                 | 52            | -    |
| <i>Gazganiga P; 1998</i>          | 45          | 35    | 10       | 6                          | 29    | -                    | -     | -                                            | 35            | -    |
| <i>Golovina DA; 2016</i>          | 101         | -     | -        | 17                         | 84    | -                    | -     | (35-84)                                      | -             | 101  |
| <i>Gopalkrishna V; 1995</i>       | 10          | -     | -        | 0                          | 10    | -                    | -     | -                                            | -             | 10   |
| <i>Gould VE; 2010</i>             | 33          | 23    | 10       | 8                          | 15    | -                    | -     | 59 (17-75)                                   | -             | 33   |
| <i>Helal Tel A; 2006</i>          | 114         | -     | -        | 12                         | 102   | -                    | -     | 50.8 (8.32/36-69)                            | -             | 114  |
| <i>Javanmard B; 2019</i>          | 110         | -     | -        | 14                         | 96    | -                    | -     | 61.6 (10/32-85)                              | -             | 110  |
| <i>Kamel D; 1995</i>              | 47          | -     | -        | -                          | -     | -                    | -     | -                                            | -             | 47   |
| <i>Kim KH; 1995</i>               | 23          | -     | -        | -                          | -     | -                    | -     | -                                            | -             | 23   |
| <i>Kim SH; 2014</i>               | 47          | 35    | 12       | 6                          | 29    | 4                    | 8     | 71.2 (7.7)                                   | -             | 47   |
| <i>LaRue H; 1995</i>              | 70          | -     | -        | -                          | -     | -                    | -     | -                                            | -             | 70   |
| <i>Llewellyn MA; 2018</i>         | 689         | -     | -        | -                          | -     | -                    | -     | -                                            | -             | -    |
| <i>Lopez-Beltran A; 1996a</i>     | 76          | -     | -        | 14                         | 62    | -                    | -     | 66.6 (1.17)                                  | -             | 76   |

|                               |     |      |    |    |     |    |    |               |     |     |
|-------------------------------|-----|------|----|----|-----|----|----|---------------|-----|-----|
| <i>López-Beltrán A; 1996b</i> | 76  | -    | -  | 14 | 62  | -  | -  | 66.6 (1.17)   | -   | 76  |
| <i>Mete UK; 2018</i>          | 60  | 50   | 10 | 2  | 48  | -  | -  | 54.1 (44-79)  | 60  | 60  |
| <i>Moghadam SO; 2020</i>      | 106 | -    | -  | 21 | 85  | -  | -  | 62.98 (10.26) | -   | 106 |
| <i>Musangile FY; 2021</i>     | 228 | 162* | -  | 46 | 182 | -  | -  | 74.8 (9.1)    | -   | 228 |
| <i>Pichler R; 2015</i>        | 186 | -    | -  | 37 | 149 | -  | -  | 72 (24-93)    | -   | 186 |
| <i>Samarska IV; 2019</i>      | 38  | -    | -  | 13 | 25  | -  | -  | -             | -   | 38  |
| <i>Sarier M; 2019</i>         | 138 | 69   | 69 | 11 | 58  | 10 | 59 | 63.2 (12.6)   | 138 | -   |
| <i>Schmid SC; 2015</i>        | 135 | 109  | 26 | 21 | 88  | 0  | 26 | 73** (45-94)  | 135 | 135 |
| <i>Shaker OG; 2013</i>        | 95  | 70   | 25 | -  | -   | -  | -  | -             | -   | 95  |
| <i>Shigehara K; 2011</i>      | 127 | 117  | 10 | 23 | 94  | -  | -  | 68.8 (36-89)  | 124 | 124 |
| <i>Shigehara K; 2013</i>      | 84  | -    | -  | 84 | -   | -  | -  | 68.8 (13.5)   | -   | 84  |
| <i>Simoneau M; 1999</i>       | 187 | 187  | -  | -  | -   | -  | -  | -             | -   | -   |
| <i>Steinestel J; 2013</i>     | 40  | 19   | 21 | 2  | 17  | 18 | 3  | 74 (9.93)     | -   | 60  |
| <i>Tekin MI; 1999</i>         | 52  | 42   | 10 | -  | -   | -  | -  | -             | 42  | -   |
| <i>Tenti P; 1996</i>          | 79  | -    | -  | 10 | 69  | -  | -  | 66.2 (23.01)  | -   | 79  |
| <i>Westenend PJ; 2001</i>     | 16  | -    | -  | 7  | 9   | -  | -  | 70 (54-96)*** | -   | 16  |
| <i>Yan Y; 2021</i>            | 146 | -    | -  | 24 | 122 | -  | -  | 66.64 (10.6)  | 146 | -   |
| <i>Yavuzer D; 2011</i>        | 70  | -    | -  | 9  | 61  | -  | -  | 61.9 (13.4)   | -   | 70  |
| <i>Youshya S; 2005</i>        | 98  | -    | -  | -  | -   | -  | -  | 73 (21-95)    | 20  | 98  |

\*66 tumor samples out of 228 were not included since were not of primary origin \*\*median \*\*\*IQR Age by sex was present in 4/46 studies Age by controls was present in 5/46 studies

**Table S3. Summary of histological subtypes and of information on tumour differentiation/grade of lesion.**

| First author                      | Histological subtypes n/N (%) |                |               | Differentiation grade, n/N (%) |               |               | Grade of lesion, n/N (%) |               |
|-----------------------------------|-------------------------------|----------------|---------------|--------------------------------|---------------|---------------|--------------------------|---------------|
|                                   | SCC                           | UC             | TCC           | G1                             | G2            | G3            | Low                      | High          |
| <i>Abdollahzadeh P; 2017</i>      | -                             | -              | 67/67 (100)   | 1/67 (1.5)                     | 24/67 (35.8)  | 67/67 (100)   | -                        | -             |
| <i>Aggarwal S; 2009</i>           | -                             | 33/33 (100)    | -             | -                              | -             | -             | 20/33 (60.6)             | 13/33 (39.4)  |
| <i>Alexander RE; 2012</i>         | 42/69 (60.9)                  | 27/69 (39.1)   | -             | -                              | -             | -             | -                        | -             |
| <i>Alexander RE; 2013</i>         | -                             | -              | -             | -                              | -             | -             | -                        | -             |
| <i>Alexander RE; 2014</i>         | -                             | -              | -             | -                              | -             | -             | -                        | -             |
| <i>Badawi H; 2008</i>             | 4/60 (6.7)                    | -              | 25/60 (41.7)  | -                              | -             | -             | -                        | -             |
| <i>Barghi MR; 2005</i>            | -                             | -              | 59/59 (100)   | -                              | -             | -             | 50/59 (84.7)             | 9/59 (15.3)   |
| <i>Ben Selma W; 2010</i>          | 5/125 (4)                     | 119/125 (95.2) | -             | 37/119 (31.1)                  | 49/119 (41.2) | 33/119 (27.7) | -                        | -             |
| <i>Berrada N; 2013</i>            | -                             | 42/48 (87.5)   | -             | -                              | -             | -             | 13/40 (32.5)             | 24/40 (60)    |
| <i>Chan KW; 1997</i>              | -                             | -              | 20/30 (66.7)  | -                              | -             | -             | -                        | -             |
| <i>Chapman-Fredricks JR; 2013</i> | 14/14 (100)                   | -              | -             | -                              | -             | -             | -                        | -             |
| <i>Collins K; 2020</i>            | 8/33 (24.2)                   | 25/33 (75.8)   | -             | -                              | -             | -             | -                        | -             |
| <i>Cooper K; 1997</i>             | 25/25 (100)                   | -              | -             | -                              | -             | -             | -                        | -             |
| <i>De Gaetani C; 1999</i>         | -                             | -              | 43/43 (100)   | 3/43 (7.0)                     | 24/43 (55.8)  | 16/43 (37.2)  | -                        | -             |
| <i>Fioriti D; 2003</i>            | -                             | -              | -             | -                              | -             | -             | -                        | -             |
| <i>Gazganiga P; 1998</i>          | -                             | -              | 35/35 (100)   | -                              | -             | -             | -                        | -             |
| <i>Golorina DA; 2016</i>          | -                             | -              | 101/101 (100) | 12/101 (11.9)                  | 48/101 (47.5) | 41/101 (40.6) | -                        | -             |
| <i>Gopalkrishna V; 1995</i>       | -                             | -              | 10/10 (100)   | -                              | -             | -             | -                        | -             |
| <i>Gould VE; 2010</i>             | -                             | -              | 5/23 (21.7)   | -                              | -             | -             | -                        | -             |
| <i>Helal Tel A; 2006</i>          | 32/114 (28.1)                 | -              | 67/114 (58.8) | -                              | -             | -             | 61/99 (61.6)             | 38/99 (38.4)  |
| <i>Javanmard B; 2019</i>          | -                             | -              | 110/110 (100) | -                              | -             | -             | 60/110 (54.5)            | 50/110 (45.5) |
| <i>Kamel D; 1995</i>              | 7/47 (14.9)                   | -              | 40/47 (85.1)  | 15/47 (31.9)                   | 19/47 (40.4)  | 13/47 (27.7)  |                          |               |
| <i>Kim KH; 1995</i>               | -                             | -              | 23/23 (100)   |                                |               |               | 6/20 (30)                | 14/20 (70)    |
| <i>Kim SH; 2014</i>               | 35/35 (100)                   | -              | -             | -                              | -             | -             | 4/33 (12.1)              | 29/33 (87.9)  |
| <i>LaRue H; 1995</i>              | -                             | -              | 70/70 (100)   | 11/70 (15.7)                   | 31/70 (44.3)  | 28/70 (40.0)  | -                        | -             |
| <i>Llewellyn MA; 2018</i>         | -                             | -              | -             | -                              | -             | -             | -                        | -             |
| <i>Lopez-Beltran A; 1996a</i>     | -                             | -              | 76/76 (100)   | 14/76 (18.4)                   | 28/76 (36.8)  | 34/76 (44.7)  | -                        | -             |



|                               |              |               |                |               |               |               |               |               |
|-------------------------------|--------------|---------------|----------------|---------------|---------------|---------------|---------------|---------------|
| <i>López-Beltrán A; 1996b</i> | -            | -             | 76/76 (100)    | 14/76 (18.4)  | 28/76 (36.8)  | 34/76 (44.7)  | -             | -             |
| <i>Mete UK; 2018</i>          | -            | 50/50 (100)   | -              | -             | -             | -             | 22/50 (44)    | 28/50 (56)    |
| <i>Moghadam SO; 2020</i>      | -            | -             | 106/106 (100)  | -             | -             | -             | 59/106 (55.7) | 47/106 (44.3) |
| <i>Musangile FY; 2021</i>     | -            | 162/162 (100) | -              | -             | -             | -             | -             | -             |
| <i>Pichler R; 2015</i>        | -            | 186/186 (100) | -              | 75/186 (40.3) | 77/186 (41.4) | 34/186 (18.3) | 119/186 (64)  | 67/186 (36)   |
| <i>Samarska IV; 2019</i>      | 38/38 (100)  | -             | -              | -             | -             | -             | -             | -             |
| <i>Sarier M; 2019</i>         | -            | 69/69 (100)   | -              | -             | -             | -             | 32/69 (46.4)  | 37/69 (53.6)  |
| <i>Schmid SC; 2015</i>        | -            | 109/109 (100) | -              | 41/109 (37.6) | -             | 68/109 (62.4) | -             | -             |
| <i>Shaker OG; 2013</i>        | 15/70 (21.4) | 45/70 (64.3)  | -              | -             | -             | -             | 24/45 (53.3)  | 21/45 (46.7)  |
| <i>Shigehara K; 2011</i>      | 4/117 (3.4)  | -             | 106/117 (90.6) | 28/117 (23.9) | 71/117 (60.7) | 18/117 (15.4) | -             | -             |
| <i>Shigehara K; 2013</i>      | 4/84 (4.8)   | 76/84 (90.5)  |                | 16/82 (19.5)  | 47/82 (57.3)  | 19/82 (23.2)  | 5/84 (6)      | -             |
| <i>Simoneau M; 1999</i>       | -            | -             | 187/187 (100)  | 41/187 (21.9) | 98/187 (52.4) | 24/187 (12.8) | -             | -             |
| <i>Steinestel J; 2013</i>     | -            | 19/19 (100)   | -              | -             | -             | -             | -             | -             |
| <i>Tekin MI; 1999</i>         | -            | -             | 42/42 (100)    | 16/42 (38.1)  | 14/42 (33.3)  | 12/42 (28.6)  | -             | -             |
| <i>Tenti P; 1996</i>          | -            | -             | 79/79 (100)    | 25/79 (31.7)  | 22/79 (27.8)  | 32/79 (40.5)  | -             | -             |
| <i>Westenend PJ; 2001</i>     | 16/16 (100)  | -             | -              | -             | -             | -             | -             | -             |
| <i>Yan Y; 2021</i>            | -            | -             | -              | -             | -             | -             | 36/127 (28.3) | 91/127 (71.7) |
| <i>Yavuzer D; 2011</i>        | -            | 70/70 (100)   | -              | -             | -             | 40/70 (57.1)  | 30/70 (42.9)  | 40/70 (57.1)  |
| <i>Youshya S; 2005</i>        | -            | -             | 98/98 (100)    | -             | -             | -             | -             | -             |

**Table S4. HPV detection method employed in the selected studies.** 1 and 0 indicate that the methodology was adopted, or not, respectively.

| First author                      | Detection method |     |     | First author                  | Detection method |            |            |
|-----------------------------------|------------------|-----|-----|-------------------------------|------------------|------------|------------|
|                                   | PCR              | IHC | ISH |                               | PCR              | IHC        | ISH        |
| <i>Abdollahzadeh P; 2017</i>      | 0                | 1   | 0   | <i>LaRue H; 1995</i>          | 1                | 0          | 0          |
| <i>Aggarwal S; 2009</i>           | 1                | 0   | 0   | <i>Llewellyn MA; 2018</i>     | 1                | 0          | 0          |
| <i>Alexander RE; 2012</i>         | 0                | 1   | 1   | <i>López-Beltrán A; 1996a</i> | 1                | 0          | 0          |
| <i>Alexander RE; 2013</i>         | 0                | 1   | 1   | <i>López-Beltrán A; 1996b</i> | 1                | 1          | 1          |
| <i>Alexander RE; 2014</i>         | 0                | 1   | 1   | <i>Mete UK; 2018</i>          | 1                | 0          | 0          |
| <i>Badawi H; 2008</i>             | 1                | 0   | 0   | <i>Moghadam SO; 2020</i>      | 1                | 0          | 1          |
| <i>Barghi MR; 2005</i>            | 1                | 0   | 0   | <i>Musangile FY; 2021</i>     | 1                | 1          | 0          |
| <i>Ben Selma W; 2010</i>          | 1                | 0   | 0   | <i>Pichler R; 2015</i>        | 1                | 0          | 0          |
| <i>Berrada N; 2013</i>            | 1                | 0   | 0   | <i>Samarska IV; 2019</i>      | 1                | 0          | 1          |
| <i>Chan KW; 1997</i>              | 1                | 1   | 0   | <i>Sarier M; 2019</i>         | 1                | 0          | 0          |
| <i>Chapman-Fredricks JR; 2013</i> | 1                | 1   | 1   | <i>Schmid SC; 2015</i>        | 1                | 0          | 0          |
| <i>Collins K; 2020</i>            | 0                | 1   | 1   | <i>Shaker OG; 2013</i>        | 0                | 0          | 1          |
| <i>Cooper K; 1997</i>             | 1                | 0   | 1   | <i>Shigehara K; 2011</i>      | 1                | 1          | 1          |
| <i>De Gaetani C; 1999</i>         | 0                | 0   | 1   | <i>Shigehara K; 2013</i>      | 1                | 1          | 1          |
| <i>Fioriti D; 2003</i>            | 1                | 0   | 0   | <i>Simoneau M; 1999</i>       | 1                | 0          | 0          |
| <i>Gazganiga P; 1998</i>          | 1                | 0   | 0   | <i>Steinestel J; 2013</i>     | 1                | 0          | 0          |
| <i>Golorina DA; 2016</i>          | 1                | 0   | 0   | <i>Tekin MI; 1999</i>         | 1                | 0          | 0          |
| <i>Gopalkrishna V; 1995</i>       | 1                | 0   | 1   | <i>Tenti P; 1996</i>          | 1                | 1          | 0          |
| <i>Gould VE; 2010</i>             | 1                | 1   | 0   | <i>Westenend PJ; 2001</i>     | 0                | 0          | 1          |
| <i>Helal Tel A; 2006</i>          | 1                | 1   | 1   | <i>Yan Y; 2021</i>            | 1                | 0          | 0          |
| <i>Javanmard B; 2019</i>          | 1                | 0   | 0   | <i>Yavuzer D; 2011</i>        | 1                | 0          | 0          |
| <i>Kamel D; 1995</i>              | 1                | 1   | 1   | <i>Youshya S; 2005</i>        | 1                | 1          | 0          |
| <i>Kim KH; 1995</i>               | 1                | 0   | 0   | <b>Total %</b>                | <b>PCR</b>       | <b>IHC</b> | <b>ISH</b> |
| <i>Kim SH; 2014</i>               | 1                | 1   | 0   |                               | 80.4             | 34.8       | 37         |

**Table S5:** HPV prevalence by genotypes. Prevalence of low risk (LR) HPV6 and HPV11, of high risk (HR) HPV16 and HPV18, and of other HR genotypes was calculated on the total number of identified genotypes. Other HR includes the following genotypes: HPV31, HPV33, HPV35, HPV39, and HPV52.

| First author's name        | Prevalence by HPV genotypes |            |              |              |             |
|----------------------------|-----------------------------|------------|--------------|--------------|-------------|
|                            | HPV6                        | HPV11      | HPV16        | HPV18        | Other HR    |
| Abdollahzadeh P; 2017      | -                           | -          | -            | -            | -           |
| Aggarwal S; 2009           | -                           | -          | 4/18 (22.2)  | 4/18 (22.2)  | -           |
| Alexander RE; 2012         | -                           | -          | -            | -            | -           |
| Alexander RE; 2013         | -                           | -          | -            | -            | -           |
| Alexander RE; 2014         | -                           | -          | -            | -            | -           |
| Badawi H; 2008             | -                           | -          | 5/21 (23.8)  | 5/21 (23.8)  | -           |
| Barghi MR; 2005            | 4/24 (16.7)                 | -          | 17/24 (70.8) | 17/24 (70.8) | 3/24 (12.5) |
| Ben Selma W; 2010          | -                           | -          | -            | -            | -           |
| Berrada N; 2013            | -                           | -          | -            | -            | 2/27 (7.4)  |
| Chan KW; 1997              | -                           | -          | 6/7 (85.7)   | 6/7 (85.7)   | -           |
| Chapman-Fredricks JR; 2013 | -                           | -          | -            | -            | 1/2 (33.3)  |
| Collins K; 2020            | -                           | -          | -            | -            | -           |
| Cooper K; 1997             | -                           | -          | -            | -            | -           |
| De Gaetani C; 1999         | -                           | -          | -            | -            | -           |
| Fioriti D; 2003            | 1/1 (100)                   | -          | -            | -            | -           |
| Gazzaniga P; 1998          | -                           | -          | 5/11 (45.5)  | 5/11 (45.5)  | -           |
| Golovina DA; 2016          | -                           | -          | -            | -            | -           |
| Gopalkrishna V; 1995       | -                           | -          | -            | -            | -           |
| Gould VE; 2010             | -                           | 1/7 (14.3) | 1/7 (14.3)   | 1/7 (14.3)   | -           |
| Helal Tel A; 2006          | -                           | -          | -            | -            | -           |
| Javanmard B; 2019          | -                           | -          | 27/52 (24.5) | 27/52 (24.5) | -           |
| Kamel D; 1995              | 13/81 (48.1)                | 10/81 (37) | 16/81 (59.3) | 16/81 (59.3) | -           |
| Kim KH; 1995               | -                           | -          | 8/12 (100)   | 8/12 (100)   | -           |
| Kim SH; 2014               | -                           | -          | 5/6 (83.3)   | 5/6 (83.3)   | 1/6 (16.7)  |
| LaRue H; 1995              | -                           | -          | -            | -            | -           |

|                       |             |           |              |              |              |
|-----------------------|-------------|-----------|--------------|--------------|--------------|
| Llewellyn MA; 2018    | -           | -         | -            | -            | -            |
| Lopez-Beltran A; 1996 | -           | -         | -            | -            | -            |
| López-Beltrán A; 1996 | -           | -         |              |              |              |
| Mete UK; 2018         | -           | -         | -            | -            | -            |
| Moghadam SO; 2020     | 1/23 (4.2)  | 6/23 (25) | 6/23 (25)    | 6/23 (25)    | -            |
| Musangile FY; 2021    | -           | -         | -            | -            | -            |
| Pichler R; 2015       | 2/3 (50)    | -         | -            | -            | -            |
| Samarska IV; 2019     | -           | -         | -            | -            | -            |
| Sarier M; 2019        | -           | -         | -            | -            | -            |
| Schmid SC; 2015       | -           | -         | -            | -            | -            |
| Shaker OG; 2013       | -           | -         | -            | -            | -            |
| Shigehara K; 2011     | -           | -         | 4/15 (22.2)  | 4/15 (22.2)  | 8/15 (44.4)  |
| Shigehara K; 2013     | 1/5 (20)    | -         | -            | -            | 1/5 (20)     |
| Simoneau M; 1999      | 3/14 (18.8) | -         | 3/14 (18.8)  | 3/14 (18.8)  | -            |
| Steinestel J; 2013    | -           | -         | -            | -            | -            |
| Tekin MI; 1999        | -           | -         | -            | -            | 1/1 (50)     |
| Tenti P; 1996         | -           | -         | 10/33 (30.3) | 10/33 (30.3) | -            |
| Westenend PJ; 2001    | -           | -         | -            | -            | -            |
| Yan Y; 2021           | -           | -         | 36/64 (85.7) | 36/64 (85.7) | 19/64 (29.7) |
| Yavuzer D; 2011       | -           | -         | -            | -            | -            |
| Youshya S; 2005       | -           | -         | -            | -            | -            |

**Figure S1.** Pooled risk difference by gender [20, 22, 24-25, 29-30, 33, 37, 40-43, 45-46, 51, 57].

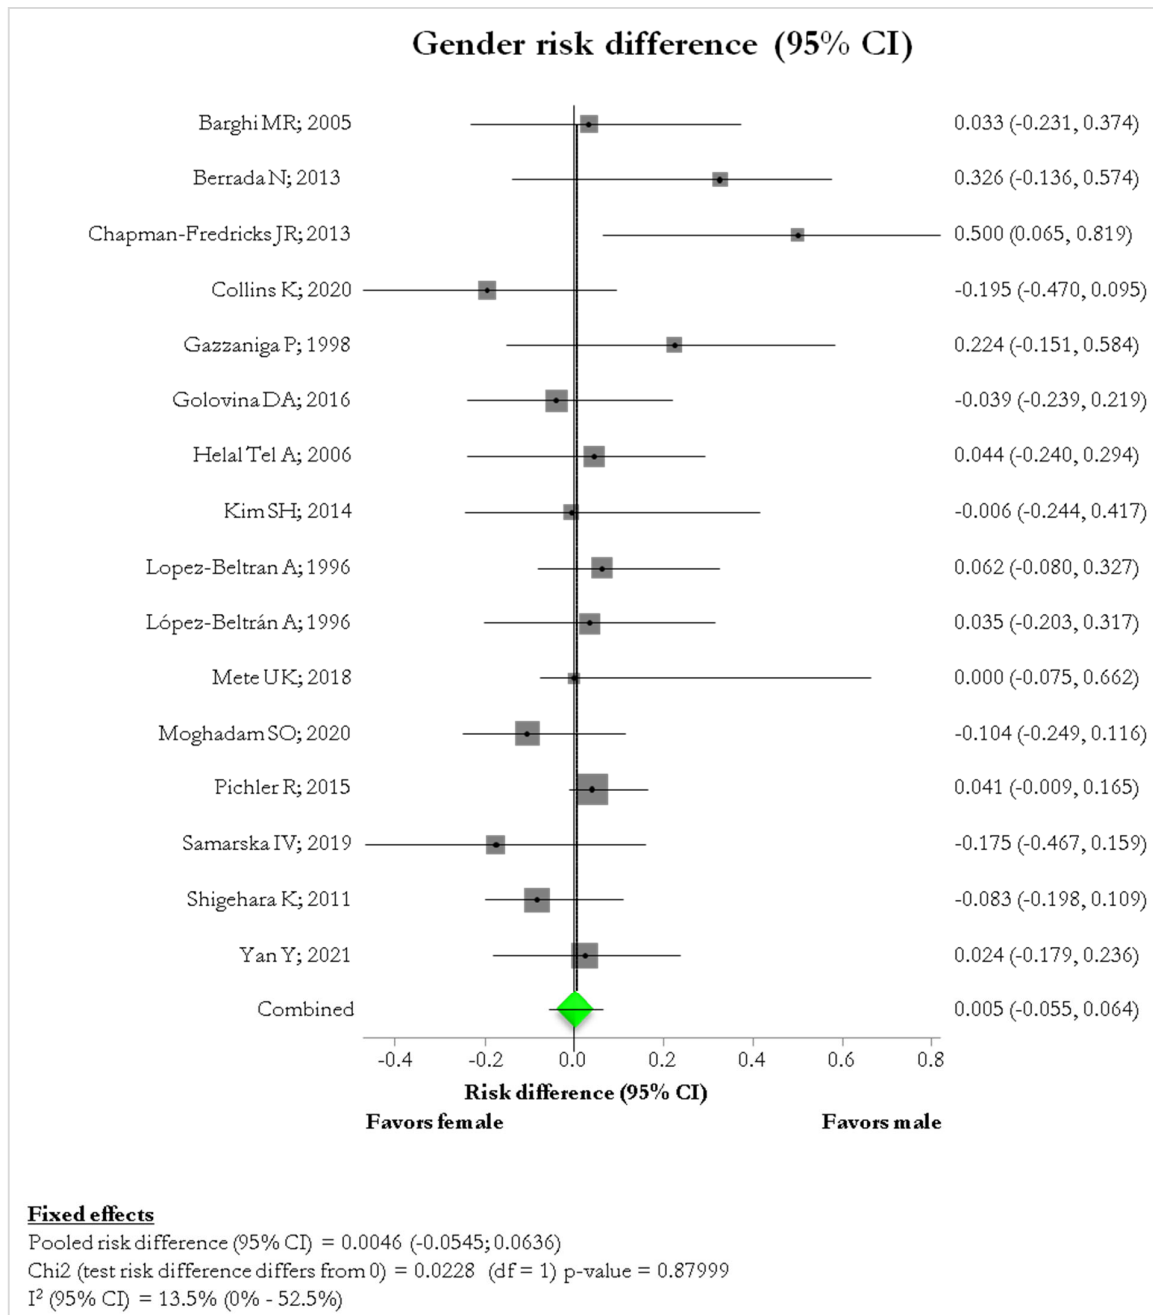

**Figure S2.** Pooled risk difference by tumor grading [14, 27, 30, 35-36, 38, 40-41, 45, 50-52, 54].

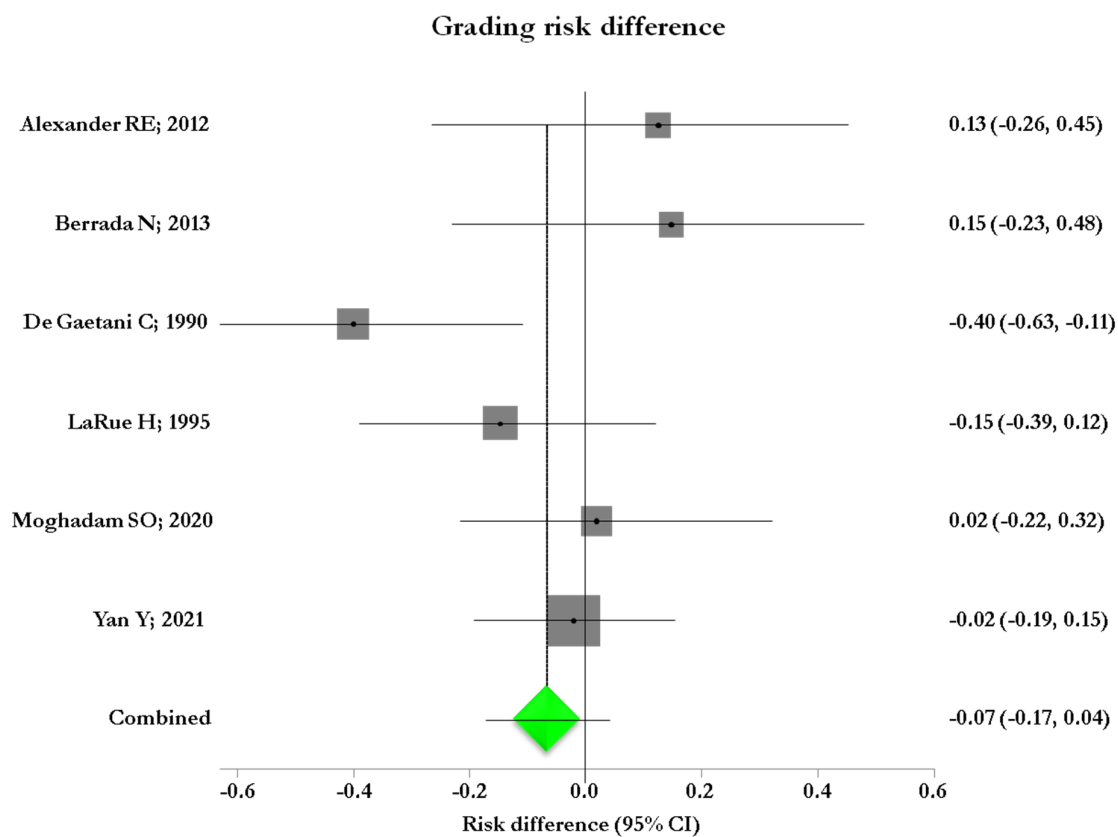

**Random effects**

Pooled risk difference (95% CI) = -0.0659 (-0.173; 0.0411)

Chi2 (test risk difference differs from 0) = 1.4567 (df = 1) p-value = 0.22746

I<sup>2</sup> (95% CI) = 45.2% (0%-76.7%)

**Figure S3.** Pooled risk difference by tumor stage [16, 22, 27, 38, 43, 57].

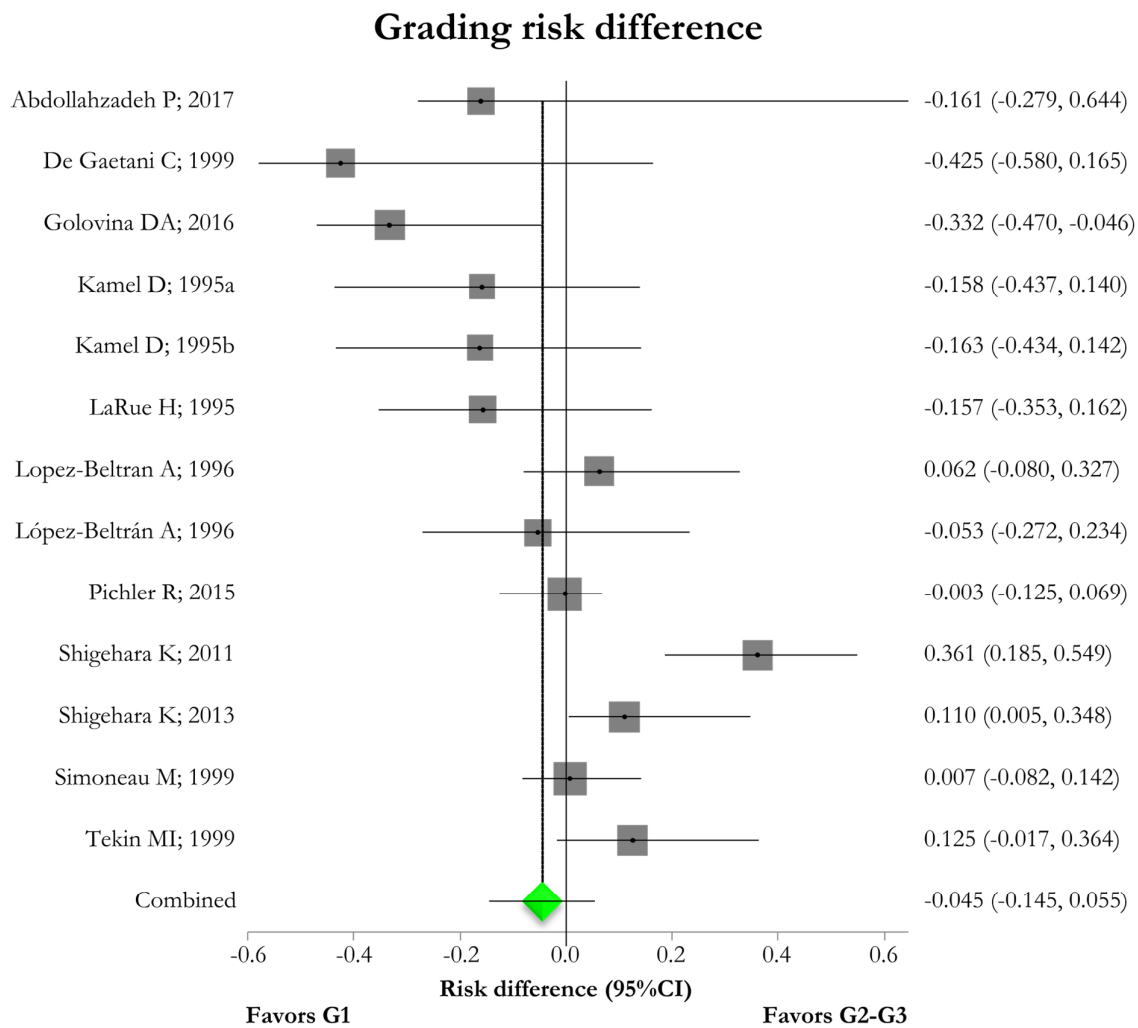

### Random effects

Pooled risk difference (95% CI) = -0.0451 (-0.1447; 0.0546)

Chi2 (test risk difference differs from 0) = 0.7857 (df = 1) p-value = 0.37542

$$I^2 \text{ (95\% CI)} = 75.9\% \text{ (55\%-84.7\%)}$$
